# Supplementary material for: In silico-driven identification of novel molluscicides effective against Biomphalaria glabrata (Say, 1818)
Source: Royal Society of Chemistry journal article supplement (doi:10.1039/d0nj03314f), 2020-01-01
Supplement: d0nj03314f1.pdf [file d0nj03314f1.pdf]

# *In Silico*-Driven Identification of Novel Molluscicides Effective Against *Biomphalaria glabrata* (Say, 1818)

Daniela Braz dos Santos<sup>a,1</sup>; José Teófilo Moreira-Filho<sup>a,b,1</sup>; Amanda de Oliveira Melo<sup>a</sup>; Josiel Araújo Lemes<sup>c</sup>; Luciana Damacena Silva<sup>d</sup>; Thiago Lopes Rocha<sup>e</sup>; Carolina Horta Andrade<sup>b\*</sup>; Bruno Junior Neves<sup>b\*\*</sup> and José Clecildo Barreto Bezerra<sup>a\*\*\*</sup>

<sup>a</sup> Laboratory for Studies of the Host-parasite Relationship, Instituto de Patologia Tropical e Saúde Pública, Universidade Federal de Goiás, Goiânia, Goiás, Brazil.

<sup>b</sup> LabMol – Laboratory for Molecular Modeling and Drug Design, Faculdade de Farmácia, Universidade Federal de Goiás, Goiânia, Goiás, Brazil

<sup>c</sup> Laboratory of Cheminformatics, Centro Universitário de Anápolis—UniEVANGÉLICA, Anápolis, Brazil

<sup>d</sup> Laboratory of Host-Parasite Interactions, Universidade Estadual de Goiás, Anápolis, Goiás, Brazil.

<sup>e</sup> Laboratory of Environmental Biotechnology and Ecotoxicology, Instituto de Patologia Tropical e Saúde Pública, Universidade Federal de Goiás, Goiânia, Goiás, Brazil.

<sup>1</sup> These authors provided equal contributions to this study and should be considered as co-first authors.

\* Corresponding author 1 – email: [carolina@ufg.br](mailto:carolina@ufg.br); \*\* Corresponding author 2 – email: [brunoneves@ufg.br](mailto:brunoneves@ufg.br); \*\*\* Corresponding author 3 – email: [clecildo@ufg.br](mailto:clecildo@ufg.br)

## SUPPORT INFORMATION

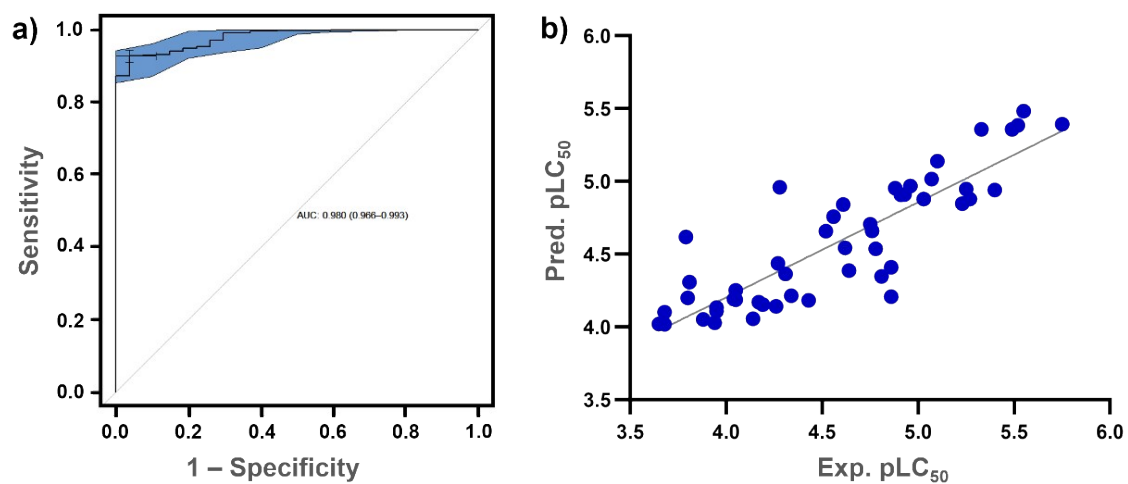

**Figure S1.** (a) ROC curve of the best shape-based model ranked by the TanimotoCombo scoring function (AUC = 0.98); (b) Scatter plots of observed vs. predicted pLC<sub>50</sub> values of the best Machine learning model (MACCS+RDKit) generated from 5-fold external cross-validation procedure.

**Table S1.** Frequency (%) of phenotypic alterations in adult snails of *Biomphalaria glabrata* after exposure to test compounds for 96h. Results are presented as means  $\pm$  standard deviations.

| Compounds concentration ( $\mu$ M) | Morphological alterations                                                         |                                                                                    |                                                                                     |                 |
|------------------------------------|-----------------------------------------------------------------------------------|------------------------------------------------------------------------------------|-------------------------------------------------------------------------------------|-----------------|
|                                    | Normal (%)                                                                        | Lethargy and reclusion into the shell (%)                                          | Hemolymph release (%)                                                               |                 |
|                                    | 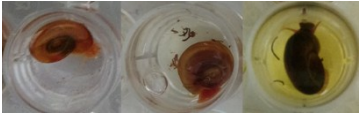 |  |  |                 |
| 3                                  | 6.25                                                                              | 44.4 $\pm$ 19.2                                                                    | 22.2 $\pm$ 19.2                                                                     | 33.3 $\pm$ 0    |
|                                    | 12.5                                                                              | 33.3 $\pm$ 0.0                                                                     | 33.3 $\pm$ 0                                                                        | 33.3 $\pm$ 0    |
|                                    | 25                                                                                | 0 $\pm$ 0                                                                          | 33.3 $\pm$ 0                                                                        | 66.7 $\pm$ 0    |
|                                    | 50                                                                                | 0 $\pm$ 0                                                                          | 22.2 $\pm$ 19.2                                                                     | 77.8 $\pm$ 19.2 |
|                                    | 100                                                                               | 0 $\pm$ 0                                                                          | 0 $\pm$ 0                                                                           | 100 $\pm$ 0     |
|                                    | 200                                                                               | 0 $\pm$ 0                                                                          | 0 $\pm$ 0                                                                           | 100 $\pm$ 0     |
| 4                                  | 6.25                                                                              | 77.8 $\pm$ 19.2                                                                    | 0 $\pm$ 0                                                                           | 22.2 $\pm$ 19.2 |
|                                    | 12.5                                                                              | 44.4 $\pm$ 19.2                                                                    | 33.3 $\pm$ 0                                                                        | 22.2 $\pm$ 19.2 |
|                                    | 25                                                                                | 22.2 $\pm$ 19.2                                                                    | 33.3 $\pm$ 0                                                                        | 44.4 $\pm$ 19.2 |
|                                    | 50                                                                                | 0 $\pm$ 0                                                                          | 22.2 $\pm$ 19.2                                                                     | 77.8 $\pm$ 19.2 |
|                                    | 100                                                                               | 0 $\pm$ 0                                                                          | 0 $\pm$ 0                                                                           | 100 $\pm$ 0     |
|                                    | 200                                                                               | 0 $\pm$ 0                                                                          | 0 $\pm$ 0                                                                           | 100 $\pm$ 0     |
| 5                                  | 6.25                                                                              | 88.9 $\pm$ 19.2                                                                    | 0 $\pm$ 0                                                                           | 11.1 $\pm$ 19.2 |
|                                    | 12.5                                                                              | 55.6 $\pm$ 19.2                                                                    | 33.3 $\pm$ 0                                                                        | 11.1 $\pm$ 19.2 |
|                                    | 25                                                                                | 55.6 $\pm$ 19.2                                                                    | 33.3 $\pm$ 0                                                                        | 11.1 $\pm$ 19.2 |
|                                    | 50                                                                                | 44.4 $\pm$ 19.2                                                                    | 44.4 $\pm$ 19.2                                                                     | 11.1 $\pm$ 19.2 |
|                                    | 100                                                                               | 0 $\pm$ 0                                                                          | 0 $\pm$ 0                                                                           | 100 $\pm$ 0     |
|                                    | 200                                                                               | 0 $\pm$ 0                                                                          | 0 $\pm$ 0                                                                           | 100 $\pm$ 0     |
| 6                                  | 6.25                                                                              | 77.8 $\pm$ 19.2                                                                    | 22.2 $\pm$ 19.2                                                                     | 0 $\pm$ 0       |
|                                    | 12.5                                                                              | 55.6 $\pm$ 19.2                                                                    | 33.3 $\pm$ 0                                                                        | 11.1 $\pm$ 19.2 |
|                                    | 25                                                                                | 55.6 $\pm$ 19.2                                                                    | 33.3 $\pm$ 0                                                                        | 11.1 $\pm$ 19.2 |
|                                    | 50                                                                                | 33.3 $\pm$ 0                                                                       | 55.6 $\pm$ 19.2                                                                     | 11.1 $\pm$ 19.2 |
|                                    | 100                                                                               | 0 $\pm$ 0                                                                          | 0 $\pm$ 0                                                                           | 100 $\pm$ 0     |
|                                    | 200                                                                               | 0 $\pm$ 0                                                                          | 0 $\pm$ 0                                                                           | 100 $\pm$ 0     |
| 7                                  | 6.25                                                                              | 77.8 $\pm$ 19.2                                                                    | 22.2 $\pm$ 19.2                                                                     | 0 $\pm$ 0       |
|                                    | 12.5                                                                              | 66.7 $\pm$ 0                                                                       | 33.3 $\pm$ 0                                                                        | 0 $\pm$ 0       |
|                                    | 25                                                                                | 55.6 $\pm$ 19.2                                                                    | 22.2 $\pm$ 19.2                                                                     | 22.2 $\pm$ 19.2 |
|                                    | 50                                                                                | 22.2 $\pm$ 19.2                                                                    | 22.2 $\pm$ 19.2                                                                     | 55.6 $\pm$ 19.2 |
|                                    | 100                                                                               | 0 $\pm$ 0                                                                          | 22.2 $\pm$ 19.2                                                                     | 77.8 $\pm$ 19.2 |
|                                    | 200                                                                               | 0 $\pm$ 0                                                                          | 11.1 $\pm$ 19.2                                                                     | 88.9 $\pm$ 19.2 |
| 11                                 | 6.25                                                                              | 100 $\pm$ 0                                                                        | 0 $\pm$ 0                                                                           | 0 $\pm$ 0       |
|                                    | 12.5                                                                              | 55.6 $\pm$ 19.2                                                                    | 33.3 $\pm$ 0                                                                        | 11.1 $\pm$ 19.2 |
|                                    | 25                                                                                | 55.6 $\pm$ 19.2                                                                    | 33.3 $\pm$ 0                                                                        | 11.1 $\pm$ 19.2 |
|                                    | 50                                                                                | 55.6 $\pm$ 19.2                                                                    | 33.3 $\pm$ 0                                                                        | 11.1 $\pm$ 19.2 |
|                                    | 100                                                                               | 0 $\pm$ 0                                                                          | 0 $\pm$ 0                                                                           | 100 $\pm$ 0     |
|                                    | 200                                                                               | 0 $\pm$ 0                                                                          | 0 $\pm$ 0                                                                           | 100 $\pm$ 0     |
| 12                                 | 6.25                                                                              | 100 $\pm$ 0                                                                        | 0 $\pm$ 0                                                                           | 0 $\pm$ 0       |
|                                    | 12.5                                                                              | 66.7 $\pm$ 0                                                                       | 33.3 $\pm$ 0                                                                        | 0 $\pm$ 0       |
|                                    | 25                                                                                | 66.7 $\pm$ 0                                                                       | 33.3 $\pm$ 0                                                                        | 0 $\pm$ 0       |
|                                    | 50                                                                                | 66.7 $\pm$ 0                                                                       | 22.2 $\pm$ 19.2                                                                     | 11.1 $\pm$ 19.2 |
|                                    | 100                                                                               | 0 $\pm$ 0                                                                          | 22.2 $\pm$ 19.2                                                                     | 77.8 $\pm$ 19.2 |
|                                    | 200                                                                               | 0 $\pm$ 0                                                                          | 0 $\pm$ 0                                                                           | 100 $\pm$ 0     |
